# Supplementary material
Source: PubMed Central journal article supplement (PMC6239927)
Supplement: NIHMS1508257-supplement-2.pdf [file NIHMS1508257-supplement-2.pdf]

# Supplemental Figure 2

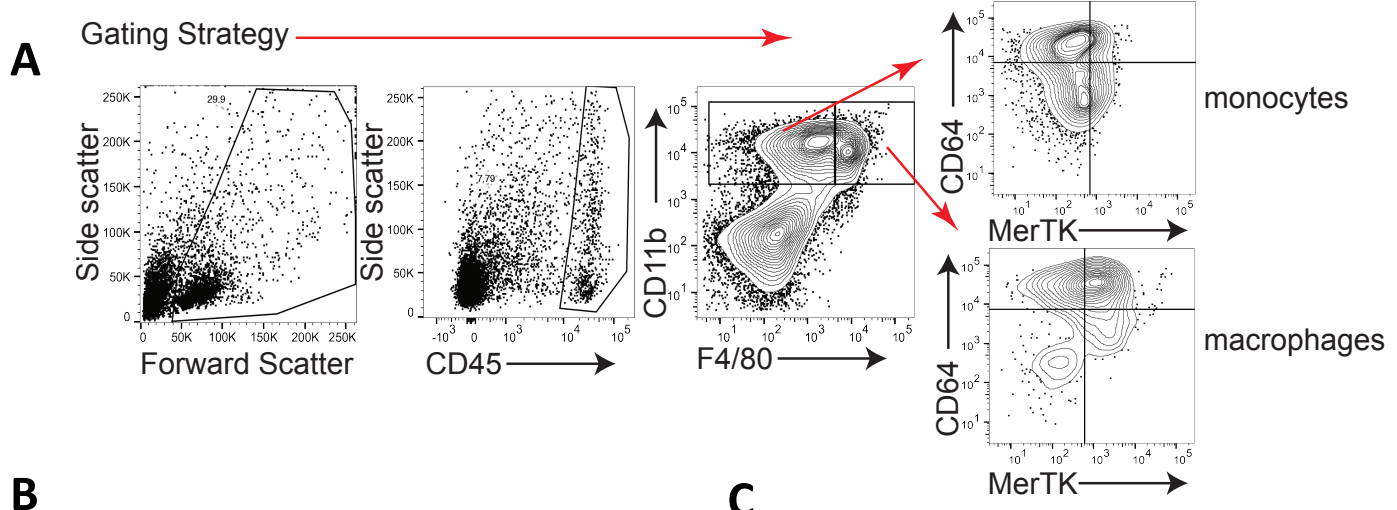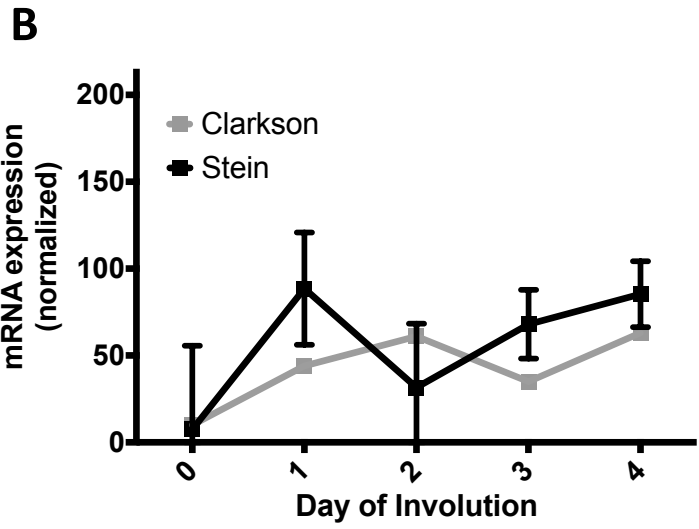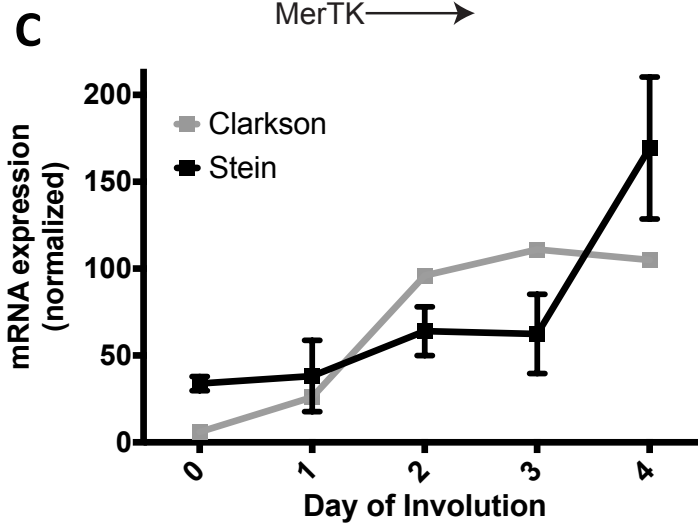

**SFigure 2:** A) For flow cytometry studies, cells were identified by forward scatter by side scatter, then gated for CD45 followed by F4/80 and CD11b. F4/80<sup>hi</sup> and F4/80<sup>lo</sup> cells were then analyzed separately for CD64 and MerTK expression in order to designate them as macrophages or monocytes. B) MCP-1 or C) CCL2 expression during involution in publicly available datasets from Clarkson et. Al. and Stein et. Al.
